# Supplementary material for: Donor age affects proteome composition of tenocyte-derived engineered tendon
Source: PubMed Central journal article supplement (PMC5771075; doi:10.1186/s12896-018-0414-5), 2018-01-16
Supplement: 12896_2018_414_MOESM2_ESM.pdf [file 12896_2018_414_MOESM2_ESM.pdf]

# INGENUITY<sup>®</sup>

## PATHWAY ANALYSIS

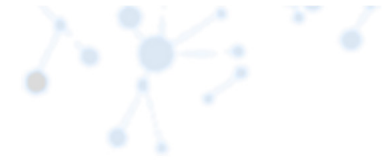

Analysis Name: teno old to young ipa - 2016-07-15 04:32 PM  
Analysis Creation Date: 2016-07-15  
Build version: 389077M  
Content version: 27821452 (Release Date: 2016-06-14)

### Analysis Settings

Reference set: Ingenuity Knowledge Base (Genes Only)  
Relationship to include: Direct and Indirect  
Includes Endogenous Chemicals  
Optional Analyses: My Pathways My List

#### Filter Summary:

Consider only relationships where  
confidence = Experimentally Observed

## Top Canonical Pathways

| Name                                                | p-value  | Overlap     |
|-----------------------------------------------------|----------|-------------|
| Hepatic Fibrosis / Hepatic Stellate Cell Activation | 2.95E-10 | 4.9 % 9/183 |
| Intrinsic Prothrombin Activation Pathway            | 5.44E-07 | 13.8 % 4/29 |
| Agrin Interactions at Neuromuscular Junction        | 1.85E-05 | 5.8 % 4/69  |
| Dendritic Cell Maturation                           | 7.14E-05 | 2.6 % 5/190 |
| Atherosclerosis Signaling                           | 2.01E-04 | 3.1 % 4/127 |

## Top Upstream Regulators

| Upstream Regulator | p-value of overlap | Predicted Activation |
|--------------------|--------------------|----------------------|
| HRAS               | 1.07E-18           | Inhibited            |
| TGFB3              | 1.34E-16           |                      |
| TGFB1              | 1.09E-15           | Activated            |
| TP53               | 7.02E-15           | Activated            |
| AHR                | 7.77E-14           | Inhibited            |

## Top Diseases and Bio Functions

### Diseases and Disorders

| Name                                | p-value             | #Molecules |
|-------------------------------------|---------------------|------------|
| Cancer                              | 6.74E-03 - 8.54E-19 | 45         |
| Connective Tissue Disorders         | 6.83E-03 - 8.54E-19 | 21         |
| Organismal Injury and Abnormalities | 6.83E-03 - 8.54E-19 | 45         |
| Reproductive System Disease         | 6.12E-03 - 8.54E-19 | 36         |
| Endocrine System Disorders          | 6.23E-03 - 5.41E-18 | 25         |

### Molecular and Cellular Functions

| Name                                   | p-value             | #Molecules |
|----------------------------------------|---------------------|------------|
| Cellular Assembly and Organization     | 6.83E-03 - 4.34E-12 | 27         |
| Cellular Function and Maintenance      | 4.75E-03 - 4.34E-12 | 27         |
| Cellular Movement                      | 6.83E-03 - 7.33E-09 | 27         |
| Cell-To-Cell Signaling and Interaction | 6.83E-03 - 1.84E-07 | 18         |
| Cell Death and Survival                | 6.83E-03 - 4.30E-07 | 21         |

### Physiological System Development and Function

| Name                                           | p-value             | #Molecules |
|------------------------------------------------|---------------------|------------|
| Cardiovascular System Development and Function | 6.83E-03 - 8.03E-08 | 19         |
| Organismal Development                         | 6.83E-03 - 6.16E-07 | 20         |
| Embryonic Development                          | 6.83E-03 - 5.10E-06 | 17         |
| Tissue Morphology                              | 6.83E-03 - 5.10E-06 | 19         |
| Connective Tissue Development and Function     | 6.83E-03 - 6.95E-06 | 20         |

### Top Tox Functions

#### Assays: Clinical Chemistry and Hematology

| Name                                | p-value             | #Molecules |
|-------------------------------------|---------------------|------------|
| Decreased Levels of Albumin         | 1.14E-02 - 1.14E-02 | 1          |
| Increased Levels of ALT             | 1.36E-02 - 1.36E-02 | 1          |
| Increased Levels of Hematocrit      | 1.99E-02 - 1.99E-02 | 2          |
| Increased Levels of Red Blood Cells | 2.23E-02 - 2.23E-02 | 2          |

#### Cardiotoxicity

| Name                     | p-value             | #Molecules |
|--------------------------|---------------------|------------|
| Congenital Heart Anomaly | 1.06E-01 - 2.28E-03 | 2          |
| Cardiac Infarction       | 3.59E-02 - 6.83E-03 | 3          |

|                      |                     |   |
|----------------------|---------------------|---|
| Cardiac Arteriopathy | 4.25E-02 - 1.36E-02 | 3 |
| Cardiac Dysfunction  | 6.63E-02 - 1.44E-02 | 2 |
| Cardiac Arrythmia    | 2.47E-01 - 4.91E-02 | 2 |

**Hepatotoxicity**

| Name                                 | p-value             | #Molecules |
|--------------------------------------|---------------------|------------|
| Liver Hyperplasia/Hyperproliferation | 1.16E-01 - 5.49E-04 | 26         |
| Liver Cirrhosis                      | 2.03E-02 - 2.04E-03 | 4          |
| Hepatocellular Carcinoma             | 1.16E-01 - 2.87E-03 | 7          |
| Liver Fibrosis                       | 5.83E-03 - 4.18E-03 | 4          |
| Liver Proliferation                  | 5.83E-03 - 5.83E-03 | 2          |

**Nephrotoxicity**

| Name                | p-value             | #Molecules |
|---------------------|---------------------|------------|
| Renal Inflammation  | 2.29E-01 - 2.28E-03 | 2          |
| Renal Nephritis     | 2.29E-01 - 2.28E-03 | 2          |
| Renal Damage        | 1.91E-02 - 1.91E-02 | 2          |
| Renal Tubule Injury | 1.91E-02 - 1.91E-02 | 2          |
| Nephrosis           | 3.81E-02 - 3.81E-02 | 1          |

**Top Regulator Effect Networks**

| ID Regulators | Diseases & Functions          | Consistency Score |
|---------------|-------------------------------|-------------------|
| 1 LEP         | organismal death,size of body | 3.13              |
| 2 TNF         | leukocyte migration           | 1.225             |
| 3 AHR         | organismal death              | -12.017           |

## Top Networks

| ID | Associated Network Functions                                                                                    | Score |
|----|-----------------------------------------------------------------------------------------------------------------|-------|
| 1  | Cancer, Connective Tissue Disorders, Organismal Injury and Abnormalities                                        | 48    |
| 2  | Cell Morphology, Connective Tissue Development and Function, Cellular Movement                                  | 39    |
| 3  | Cell Death and Survival, Cell Morphology, Hematological System Development and Function                         | 18    |
| 4  | Cell-To-Cell Signaling and Interaction, Skeletal and Muscular System Development and Function, Organ Morphology | 11    |

## Top Tox Lists

| Name                                                        | p-value  | Overlap     |
|-------------------------------------------------------------|----------|-------------|
| Hepatic Fibrosis                                            | 3.00E-09 | 6.9 % 7/101 |
| Genes associated with Chronic Allograft Nephropathy (Human) | 1.44E-05 | 14.3 % 3/21 |
| Recovery from Ischemic Acute Renal Failure (Rat)            | 4.56E-04 | 14.3 % 2/14 |
| Persistent Renal Ischemia-Reperfusion Injury (Mouse)        | 2.13E-03 | 6.7 % 2/30  |
| Acute Renal Failure Panel (Rat)                             | 8.85E-03 | 3.2 % 2/62  |

## Top Analysis-Ready Molecules

### Exp Fold Change up-regulated

| Molecules      | Exp. Value | Exp. Chart |
|----------------|------------|------------|
| <b>SORBS2</b>  | ↑ 5.144    |            |
| <b>CNN1</b>    | ↑ 3.579    |            |
| <b>COL3A1</b>  | ↑ 3.461    |            |
| <b>TGFBI</b>   | ↑ 3.160    |            |
| <b>COL14A1</b> | ↑ 3.040    |            |
| <b>COL1A2</b>  | ↑ 2.997    |            |
| <b>PALLD</b>   | ↑ 2.953    |            |
| <b>COL4A2</b>  | ↑ 2.940    |            |

**TNC**  
**NEXN**

↑ 2.922  
↑ 2.901

**Exp Fold Change down-regulated**

| Molecules       | Exp. Value | Exp. Chart |
|-----------------|------------|------------|
| <b>PHB2</b>     | ↓ -3.923   |            |
| <b>ITGB3</b>    | ↓ -2.803   |            |
| <b>SLC2A1</b>   | ↓ -2.224   |            |
| <b>UQCRH</b>    | ↓ -2.142   |            |
| <b>SERPINE2</b> | ↓ -2.108   |            |
| <b>ITGA5</b>    | ↓ -2.096   |            |
| <b>ATP5D</b>    | ↓ -2.005   |            |
